# Supplementary material for: Rocking Devices and the Role of Vestibular Stimulation on Sleep—A Systematic Review
Source: MDPI journal article supplement (doi:10.3390/ctn7040040), 2023-11-28
Supplement: s1 [file s1]

## Supplementary Tables

**Table S1.** Categorization of studies based on implemented methodology.

| Category                                                                                                                                                                                                                                                                                                                                                         | High                                                                                                                    | Moderate                                                                              | Low                                                                                                                            |
|------------------------------------------------------------------------------------------------------------------------------------------------------------------------------------------------------------------------------------------------------------------------------------------------------------------------------------------------------------------|-------------------------------------------------------------------------------------------------------------------------|---------------------------------------------------------------------------------------|--------------------------------------------------------------------------------------------------------------------------------|
| Objective measure to determine sleep stages as recommended by AASM                                                                                                                                                                                                                                                                                               | Sleep EEG measured with the minimum number of electrodes for each recommended region.                                   | Sleep EEG measured with the minimum number of electrodes for each recommended region. | Sleep EEG measured with less than minimum number of electrodes for each recommended region or no EEG measurement. <sup>3</sup> |
| Control of confounding variables                                                                                                                                                                                                                                                                                                                                 | Baseline and experimental measurements were performed in the lab and compared to measurements without vestibular input. | Baseline and experimental measurements performed in the lab.                          | Only experimental measurement in the lab or application of experimental stimulation by participants at home.                   |
| Effect of motion on sleep based on the study design                                                                                                                                                                                                                                                                                                              | Participants were assigned by study experimenter to passive vestibular stimulation conditions. <sup>2</sup>             | Participants chose the type of passive vestibular stimulation condition. <sup>2</sup> | Participants chose the type of passive vestibular stimulation or no report of applied stimulation.                             |
| Participant selection <sup>1</sup>                                                                                                                                                                                                                                                                                                                               | Men and women tested.                                                                                                   | Only men tested.                                                                      | Only men tested.                                                                                                               |
| <p>High quality for one study [15], moderate for seven studies [11-14,38-40], and low for five studies [33-37].</p> <p><sup>1</sup>In studies with human participants.</p> <p><sup>2</sup>If more than one passive vestibular stimulation intensity/type/axis was applied to participants.</p> <p><sup>3</sup>Not applicable for respiration studies [9,10].</p> |                                                                                                                         |                                                                                       |                                                                                                                                |

**Table S2.** Mean  $\pm$  SD for sleep macro-architecture outcomes.

| Paper                                        | SO (min)        |                 | N1                      |                       | N2                      |                             | N3                         |                           | REM          |               | W                         |                            | SE                        |                           |
|----------------------------------------------|-----------------|-----------------|-------------------------|-----------------------|-------------------------|-----------------------------|----------------------------|---------------------------|--------------|---------------|---------------------------|----------------------------|---------------------------|---------------------------|
|                                              | B               | R               | B                       | R                     | B                       | R                           | B                          | R                         | B            | R             | B                         | R                          | B                         | R                         |
| Woodward et al. (1990) <sup>[38]1</sup>      | 18.44 ± 13.1    | 14.25 ± 8.4     | 3.57 ± 1.1              | 4.66 ± 1.13           | 54.19 ± 3.05            | 51.82 ± 3.39**              | 9.05 ± 1.78 <sup>7</sup>   | 9.79 ± 2.06 <sup>7</sup>  | 26.72 ± 2.97 | 27.41 ± 3.22  | 17.88 ± 3.96 <sup>9</sup> | 19.81 ± 4.36 <sup>9</sup>  | 92.49 ± 2.69              | 92.37 ± 2.26              |
| Bayer et al. (2011) <sup>[11]1</sup>         | 8.85 ± 6.48     | 5.35 ± 4.93**   | 12.4 ± 5.09             | 7.9 ± 3.7**           | 12.2 ± 6.13             | 16.9 ± 32.89                | 0.3 ± 0.95                 | 0.87 ± 1.64               | NA           | NA            | 5.45 ± 3.42 <sup>9</sup>  | 4.85 ± 2.85** <sup>9</sup> | 73.1 ± 18.15              | 73.65 ± 8.79              |
| Shibagaki et al. (2017) <sup>[39]2</sup>     | NA <sup>5</sup> | NA <sup>5</sup> | NA                      | NA                    | NA <sup>5</sup>         | NA <sup>5</sup>             | NA <sup>5</sup>            | NA <sup>5</sup>           | NA           | NA            | NA                        | NA                         | NA                        | NA                        |
| Omlin et al. (2018) <sup>[12]2</sup>         | 8.48 ± 5.8      | 9.67 ± 5.43     | 10.54 ± 7.79            | 12.89 ± 11.57         | 232.5 ± 37.11           | 238.67 ± 28.63              | 88.24 ± 23.92              | 85.41 ± 22.36             | NA           | NA            | 6.87 ± 16.52              | 5.81 ± 9.4                 | 96.77 ± 4.22              | 96.5 ± 3.07               |
|                                              |                 |                 | 1.5 ± 1.52 <sup>6</sup> | 2.31 ± 3 <sup>6</sup> | 46.09 ± 13 <sup>6</sup> | 52.41 ± 11.45* <sup>6</sup> | 50.98 ± 12.11 <sup>6</sup> | 46.2 ± 10.19 <sup>6</sup> |              |               | 1.44 ± 4.48 <sup>5</sup>  | 0.67 ± 1.2 <sup>5</sup>    | 91.73 ± 7.43 <sup>5</sup> | 90.82 ± 6.18 <sup>5</sup> |
|                                              |                 |                 | B: 341.6 ± 24.08        |                       | R: 347.3 ± 22.17        |                             | 61.6 ± 2.6                 |                           |              |               | 65.7 ± 7.97               | 316.6 ± 24.25              | 306.9 ± 19.4              |                           |
| Kompotis et al. (2019) <sup>[15]2,3</sup>    | NA <sup>5</sup> | NA <sup>5</sup> | B: 387.3 ± 13.49        |                       | R:382 ± 21.17           |                             | 57.4 ± 6.35                |                           | 50.2 ± 7.67  | 275.3 ± 12.44 | 287.8 ± 24.61             | NA                         | NA                        |                           |
|                                              |                 |                 | B: 397.8 ± 9.62         |                       | R:446.1 ± 16.97*        |                             | 54.8 ± 3.96                |                           | 54.1 ± 6.22  | 267.4 ± 9.33  | 219.7 ± 17.82*            |                            |                           |                           |
|                                              |                 |                 | B: 406 ± 20.4           |                       | R:491.6 ± 32.4*         |                             | 54 ± 5.7                   |                           | 43 ± 12.3*   | 260 ± 20.1    | 185.4 ± 25.2*             |                            |                           |                           |
|                                              |                 |                 | B: 378 ± 8.4            |                       | R:374.4 ± 5.7           |                             | 63.9 ± 11.1                |                           | 66.7 ± 8.1   | 278.2 ± 102.9 | 278.9 ± 9.6               |                            |                           |                           |
|                                              |                 |                 |                         |                       |                         |                             |                            |                           |              |               |                           |                            |                           |                           |
| Perrault et al. (2019) <sup>[13]1</sup>      | 16.72 ± 14.93   | 10.08 ± 6.53*   | 6.22 ± 2.76             | 5.58 ± 2.59           | 44.26 ± 6.02            | 41.28 ± 7                   | 22.37 ± 6.79               | 27.41 ± 7**               | 22.26 ± 3.9  | 21.29 ± 3.95  | 4.89 ± 2.29               | 4.44 ± 2.33                | 92.73 ± 3.56              | 93.76 ± 2.38              |
| van Sluijs et al. (2020a) <sup>[14]1,4</sup> | 10.4 ± 2.4      | 10.8 ± 5.2      | 22.1 ± 11.5             | 12.2 ± 9.9**          | 56.9 ± 17.7             | 51.1 ± 20.2                 | 11.3 ± 13.7                | 33.9 ± 24.8*              | NA           | NA            | 9.4 ± 16.5                | 2.7 ± 3.1                  | 90.2 ± 16.6               | 97.2 ± 3.2                |
|                                              | 8.7 ± 5.2       | 11.3 ± 6.1      | 11.3 ± 14               | 11.1 ± 10.4           | 44.7 ± 15.9             | 58.3 ± 22                   | 38.7 ± 24.1                | 26.7 ± 25.8               |              |               | 5.4 ± 13.7                | 3.9 ± 6                    | 94.6 ± 13.7               | 96.1 ± 6                  |
| Van Sluijs et al. (2020b) <sup>[40]1</sup>   | 8.7 ± 5.8       | 11.4 ± 8        | 9.5 ± 5.9               | 10.1 ± 6.2            | 48.8 ± 7.1              | 48.5 ± 11.5                 | 20.3 ± 8.8                 | 21.6 ± 11.8               | 21.4 ± 5.2   | 19.7 ± 4.5    | 9.9 ± 7.4                 | 12.5 ± 13.1                | 90.7 ± 6.5                | 88.6 ± 8.8                |

NA for variable not analysed in the study; SO = sleep onset, N1 = non-rapid eye-movement sleep 1, N2 = non-rapid eye-movement sleep 2, N3 = non-rapid eye-movement sleep 3, REM = rapid eye-movement sleep, W = wake, SE = sleep efficiency; B = Baseline, R =

Rocking Condition.

\*  $p < .05$ , \*\*  $p < .01$ .

<sup>1</sup>Sleep stages reported as a percentage of total sleep time.

<sup>2</sup>Sleep stages reported as duration in min.

<sup>3</sup>The first four rows correspond to different stimulation intensities (4.9 cm/s<sup>2</sup> (n=3), 19.7 cm/s<sup>2</sup> (n=7), 79 cm/s<sup>2</sup> (n=8) & 177.7 cm/s<sup>2</sup> (n=9)) and the fifth row corresponds to mice with no functional otoliths vestibular input (79 cm/s<sup>2</sup> (n=9)).

<sup>4</sup>Upper row corresponds to the low intensity group and the lower row corresponds to the high intensity group but both represent values of the medium intensity (25cm/s<sup>2</sup>).

<sup>5</sup>No detailed values reported in a tabular form, only in figures.

<sup>6</sup>During the first two hours after sleep onset.

<sup>7</sup>Sleep stage 3.

<sup>8</sup>Sleep stage 4.

<sup>9</sup>Number of awakenings per session.

**Table S3.** Mean  $\pm$  SD for sleep micro-architecture outcomes.

| Paper                                     | Delta Power ( $\mu V^2$ )        |                                  | #SSO                              |                                   | SSO Density                   |                              | #SS                             |                                  | SS Density                   |                               |
|-------------------------------------------|----------------------------------|----------------------------------|-----------------------------------|-----------------------------------|-------------------------------|------------------------------|---------------------------------|----------------------------------|------------------------------|-------------------------------|
|                                           | B                                | R                                | B                                 | R                                 | B                             | R                            | B                               | R                                | B                            | R                             |
| Bayer et al. (2011) <sup>[11]</sup>       | NA <sup>2</sup>                  | NA <sup>2</sup>                  | NA                                | NA                                | NA                            | NA                           | 29.15 $\pm$ 19.83               | 57.5 $\pm$ 29.31**               | 1.2 $\pm$ 1.8                | 1.64 $\pm$ 2.21**             |
| Omlin et al. (2018) <sup>[12]</sup>       | 366.13 $\pm$ 119.77              | 375.47 $\pm$ 137.34              | 5265.83 $\pm$ 1717.31             | 5557.44 $\pm$ 2064.26             | 6.27 $\pm$ 2.15               | 6.4 $\pm$ 2.32               | 638.22 $\pm$ 184.36             | 671.33 $\pm$ 183.39              | 2.24 $\pm$ 0.61              | 2.3 $\pm$ 0.62                |
|                                           | 569.72 $\pm$ 214.98 <sup>3</sup> | 543.58 $\pm$ 196.22 <sup>3</sup> | 2747.33 $\pm$ 979.71 <sup>3</sup> | 2681.17 $\pm$ 851.04 <sup>3</sup> | 10.56 $\pm$ 3.78 <sup>3</sup> | 9.97 $\pm$ 3.32 <sup>3</sup> | 170 $\pm$ 44.39 <sup>3</sup>    | 195.61 $\pm$ 66.56* <sup>3</sup> | 2.12 $\pm$ 0.5 <sup>3</sup>  | 2.3 $\pm$ 0.71 <sup>3</sup>   |
|                                           |                                  |                                  |                                   |                                   |                               |                              |                                 |                                  |                              |                               |
| Kompotis et al. (2019) <sup>[15]</sup>    | NA <sup>2</sup>                  | NA <sup>2</sup>                  | NA                                | NA                                | NA                            | NA                           | NA <sup>2</sup>                 | NA <sup>2</sup>                  | NA <sup>2</sup>              | NA <sup>2</sup>               |
| Perrault et al. (2019) <sup>[13]</sup>    | NA                               | NA                               | 2334 $\pm$ 653.37 <sup>4</sup>    | 2763 $\pm$ 487.9* <sup>4</sup>    | 10.9 $\pm$ 2.25 <sup>4</sup>  | 10.7 $\pm$ 1.7 <sup>4</sup>  | 416.2 $\pm$ 193.04 <sup>5</sup> | 537.7 $\pm$ 223.16* <sup>5</sup> | 1.9 $\pm$ 0.55 <sup>5</sup>  | 2.05 $\pm$ 0.68* <sup>5</sup> |
|                                           |                                  |                                  |                                   |                                   |                               |                              | 313.4 $\pm$ 105.22 <sup>6</sup> | 442.5 $\pm$ 133.64* <sup>6</sup> | 1.53 $\pm$ 0.68 <sup>6</sup> | 1.77 $\pm$ 0.72* <sup>6</sup> |
| van Sluijs et al. (2020a) <sup>[14]</sup> | 106.4 $\pm$ 32.7 <sup>4</sup>    | 118.7 $\pm$ 35.5 <sup>4</sup>    | 194.3 $\pm$ 212.9                 | 331 $\pm$ 288.5                   | 4 $\pm$ 2.1                   | 6.6 $\pm$ 2.3*               | 26.7 $\pm$ 15.93                | 47 $\pm$ 23.32* <sup>4</sup>     | 1.56 $\pm$ 0.91 <sup>4</sup> | 1.78 $\pm$ 0.93 <sup>4</sup>  |
|                                           | 164.4 $\pm$ 85 <sup>4</sup>      | 166.7 $\pm$ 110.8 <sup>4</sup>   | 572.6 $\pm$ 389.3                 | 447.9 $\pm$ 451.6                 | 7.1 $\pm$ 2.9                 | 5.7 $\pm$ 3.6                | 57.55 $\pm$ 37.66               | 49.82 $\pm$ 42.22                | 1.86 $\pm$ 0.89              | 1.95 $\pm$ 1.15               |
| Van Sluijs et al. (2020b) <sup>[40]</sup> | 349.3 $\pm$ 138.9 <sup>4</sup>   | 306.5 $\pm$ 93.9 <sup>4</sup>    | 1145.2 $\pm$ 720.6                | 1038.8 $\pm$ 574.5                | 1.6 $\pm$ 0.6                 | 1.5 $\pm$ 0.5                | 1.7 $\pm$ 0.7                   | 1.6 $\pm$ 0.6                    | 424.1 $\pm$ 187.8            | 397.7 $\pm$ 163.3             |

NA for variable not analysed in the study; #SSO = number of sleep slow oscillations, SSO Density = sleep slow oscillations density, #SS = number of sleep spindles, SS Density = sleep spindle density; B = Baseline, R = Rocking Condition.

\*  $p < .05$ , \*\*  $p < .01$ .

<sup>1</sup>Upper row corresponds to the low intensity group and the lower row corresponds to the high intensity group but both represent values of the medium intensity (25cm/s<sup>2</sup>).

<sup>2</sup>No detailed values reported in the running text/tabular form but in figures only.

<sup>3</sup>During the first two hours after sleep onset.

<sup>4</sup>In N3.

<sup>5</sup>Fast Spindles (2.5-15.5 Hz) measured on Pz.

<sup>6</sup>Slow Spindles (8.5-12 Hz) measured on Fz.

**Table S4.** Mean differences for all the reported sleep macro- and micro-architecture outcomes and Hedges' g for all the significant differences.

| Paper                                        | SO              | N1                | N2                           | N3                       | REM      | W                  | SE                 | Delta Power         | #SSO                      | SSO Density        | #SS                            | SS Density                    |
|----------------------------------------------|-----------------|-------------------|------------------------------|--------------------------|----------|--------------------|--------------------|---------------------|---------------------------|--------------------|--------------------------------|-------------------------------|
|                                              | Diff (g)        | Diff (g)          | Diff (g)                     | Diff (g)                 | Diff (g) | Diff (g)           | Diff (g)           | Diff (g)            | Diff (g)                  | Diff (g)           | Diff (g)                       | Diff (g)                      |
| Woodward et al. (1990) <sup>[38]1</sup>      | -4.19           | 1.09              | -2.37<br>(0.7)**             | $\frac{0.74^7}{-0.14^8}$ | 0.69     | 1.93 <sup>9</sup>  | -0.12              | NA                  | NA                        | NA                 | NA                             | NA                            |
| Bayer et al. (2011) <sup>[11]1</sup>         | -3.5 (-0.58)**  | -4.5 (-0.97)**    | 4.7 (0.13)**                 | 0.57                     | NA       | -0.6 (-0.12)**     | 0.55               | NA <sup>5</sup>     | NA                        | NA                 | 28.35<br>(1.12)**              | 0.44<br>(0.21)**              |
| Shibagaki et al. (2017) <sup>[39]2</sup>     | NA <sup>5</sup> | NA                | NA <sup>5</sup>              | NA <sup>5</sup>          | NA       | NA                 | NA                 | NA                  | NA                        | NA                 | NA                             | NA                            |
| Omlin et al. (2018) <sup>[12]2</sup>         | 1.19            | 2.35              | 6.17                         | -2.83                    | NA       | -1.06              | -0.27              | 9.34                | 291.61                    | 0.13               | 33.11                          | 0.06                          |
|                                              |                 | 0.81 <sup>6</sup> | 6.32<br>(0.51)* <sup>6</sup> | -4.78 <sup>6</sup>       |          | -0.77 <sup>6</sup> | -0.91 <sup>6</sup> | -26.14 <sup>6</sup> | -66.16 <sup>6</sup>       | -0.59 <sup>6</sup> | 25.61<br>(0.44)* <sup>6</sup>  | 0.18 <sup>6</sup>             |
|                                              |                 |                   | 5.7                          |                          |          | 4.1                | -9.7               |                     |                           |                    |                                |                               |
|                                              |                 |                   | -5.3                         |                          |          | -7.2               | 12.5               |                     |                           |                    |                                |                               |
|                                              |                 |                   | 48.3 (3.3)*                  |                          |          | -0.7               | -47.7 (-3.17)*     | NA                  | NA <sup>5</sup>           | NA                 | NA <sup>5</sup>                | NA <sup>5</sup>               |
| Kompotis et al. (2019) <sup>[15]1,3</sup>    | NA <sup>5</sup> |                   | 85.6 (3.01)*                 |                          | NA       | -11 (-1.1)*        | 85.6 (3.01)*       |                     |                           |                    |                                |                               |
|                                              |                 |                   | -3.6                         |                          |          | 2.8                | 0.7                |                     |                           |                    |                                |                               |
|                                              |                 |                   |                              |                          |          |                    |                    |                     |                           |                    |                                |                               |
| Perrault et al. (2019) <sup>[13]1</sup>      | -6.64 (-0.57)*  | -0.64             | -2.98                        | 5.04<br>(0.71)**         | -0.97    | -0.45              | 1.03               | NA                  | 429 (0.72)* <sup>10</sup> | -0.2 <sup>9</sup>  | 121.5<br>(0.57)* <sup>11</sup> | 0.15<br>(0.23)* <sup>11</sup> |
|                                              |                 |                   |                              |                          |          |                    |                    |                     |                           |                    | 129.1<br>(1.05)* <sup>12</sup> | 0.24<br>(0.33)* <sup>12</sup> |
|                                              |                 |                   |                              |                          |          |                    |                    |                     |                           |                    |                                |                               |
| van Sluijs et al. (2020a) <sup>[14]1,4</sup> | -0.4            | -9.9 (-0.88)**    | -5.8                         | 22.6<br>(1.08)*          | NA       | -6.7               | 7                  | 12.3 <sup>10</sup>  | 136.7                     | 4 (1.73)*          | 20.3 (0.97)*                   | 0.22                          |
|                                              | 2.6             | -0.2              | 13.6                         | 12                       |          | -1.5               | 1.5                | 2.3 <sup>10</sup>   | -0.2                      | -1.4               | -7.73                          | 0.09                          |
| Van Sluijs et al. (2020b) <sup>[40]1</sup>   | 2.7             | 0.6               | -0.3                         | 1.3                      | 1.7      | 2.6                | -2.1               | -42.8 <sup>10</sup> | -106.4                    | -0.1               | -0.1                           | -26.4                         |

NA for variable not analysed in the study; SO = sleep onset, N1 = non-rapid eye-movement sleep 1, N2 = non-rapid eye-movement sleep 2, N3 = non-rapid eye-movement sleep 3, REM = rapid eye-movement sleep, W = wake, SE = sleep efficiency, #SSO = number of sleep slow oscillations, SSO Density = sleep slow oscillations density, #SS = number of sleep spindles, SS Density = sleep spindle density.

\* p < .05, \*\* p < .01.

<sup>1</sup>Sleep stages reported as a percentage of total sleep time.

<sup>2</sup>Sleep stages reported as duration in min.

<sup>3</sup> The first four rows correspond to different stimulation intensities (4.9 cm/s<sup>2</sup> (n=3), 19.7 cm/s<sup>2</sup> (n=7), 79 cm/s<sup>2</sup> (n=8) & 177.7 cm/s<sup>2</sup> (n=9)) and the fifth row corresponds to mice with no functional otoliths and a vestibular input of 79 cm/s<sup>2</sup> (n=9).

<sup>4</sup>Upper row corresponds to the low intensity group and the lower row corresponds to the high intensity group but both represent values of the medium intensity (25cm/s<sup>2</sup>).

<sup>5</sup>No detailed values reported in the running text/tabular form but in figures only.

<sup>6</sup>During the first two hours after sleep onset.

<sup>7</sup>Sleep stage 3.

<sup>8</sup>Sleep stage 4.

<sup>9</sup>Number of awakenings per session.

<sup>10</sup>In N3.

<sup>11</sup>Fast Spindles (2.5-15.5 Hz) measured on Pz.

<sup>12</sup>Slow Spindles (8.5-12 Hz) measured on Fz.

**Table S5.** Mean  $\pm$  SD and the mean differences for all the reported memory outcomes, along with Hedges' g for all the significant differences.

| Paper                                                  | Initial Recall                 |                                |                    | Delayed Recall                 |                                |                   | Overnight Performance Improvement |                  |             | Initial Acquisition Rate |                 |                 |
|--------------------------------------------------------|--------------------------------|--------------------------------|--------------------|--------------------------------|--------------------------------|-------------------|-----------------------------------|------------------|-------------|--------------------------|-----------------|-----------------|
|                                                        | B                              | R                              | Diff (g)           | B                              | R                              | Diff (g)          | B                                 | R                | Diff (g)    | B                        | R               | Diff (g)        |
| Omlin et al. (2018) <sup>[12]</sup> <sup>1</sup>       | NA <sup>3</sup>                | NA <sup>3</sup>                | NA <sup>3</sup>    | NA <sup>3</sup>                | NA <sup>3</sup>                | NA <sup>3</sup>   | 6.72 $\pm$ 3.76                   | 6.69 $\pm$ 3.43  | -0.03       | NA <sup>3</sup>          | NA <sup>3</sup> | NA <sup>3</sup> |
| Perrault et al. (2019) <sup>[13]</sup>                 | 15.59 $\pm$ 38.51 <sup>4</sup> | 15.47 $\pm$ 48.12 <sup>4</sup> | -0.12 <sup>4</sup> | 16.59 $\pm$ 43.42 <sup>4</sup> | 17.41 $\pm$ 50.18 <sup>4</sup> | 0.82 <sup>4</sup> | 1.53 $\pm$ 5.98                   | 4.71 $\pm$ 4.16* | 3.18 (0.60) | NA <sup>3</sup>          | NA <sup>3</sup> | NA <sup>3</sup> |
| Van Sluijs et al. (2020a) <sup>[14]</sup>              | 22.4 $\pm$ 6.2                 | 21.8 $\pm$ 6.3                 | -0.6               | 30 $\pm$ 6.2                   | 30.1 $\pm$ 6.3                 | 0.1               | 7.6 $\pm$ 3.2                     | 8.3 $\pm$ 3.4    | 0.7         | 74.2 $\pm$ 11.1          | 71.9 $\pm$ 10.8 | -2.3            |
| Van Sluijs et al. (2020b) <sup>[40]</sup> <sup>1</sup> | 15.8 $\pm$ 7                   | 16.1 $\pm$ 7.5                 | 0.3                | 17.2 $\pm$ 7.8                 | 19 $\pm$ 9                     | 1.8               | 1.5 $\pm$ 2.5                     | 2.9 $\pm$ 3.7    | 1.4         | 100 $\pm$ 40.7           | 90.8 $\pm$ 32.4 | 9.2             |

NA for variable not analysed/reported in the study; Overnight Performance Improvement = Delayed Recall - Initial Recall, Initial Acquisition Rate = Initial Recall/ Delayed Recall\*100. \* p < .05.

<sup>1</sup>Reported as Hits

<sup>2</sup>Reported as Accuracy = Hits – Errors.

<sup>3</sup>No detailed values reported in the running text/tabular form but in figures only.

<sup>4</sup>Baseline-Experimental analyses with Accuracy (i.e., Hits – Errors) but values in tabular form available in Hits.
